# Supplementary material for: A multi-omic analysis of human naïve CD4+ T cells
Source: Springer Nature journal article supplement (doi:10.1186/s12918-015-0225-4), 2015-11-06
Supplement: 12918_2015_225_MOESM1_ESM.pdf [file 12918_2015_225_MOESM1_ESM.pdf]

# Figure S1

## DNA

### Whole Genome Sequencing

Peripheral Blood Mononuclear Cells

6.78 Billion Mapped Reads

34x coverage

### Targeted DNA Sequencing

Naïve CD4+ T cells

1.08 million reads

283x coverage per site

### Methylation Array

Illumina 450K BeadChip

Naïve CD4+ T cells

2 technical replicates

Memory CD4+ T cells

2 technical replicates

## RNA

### RNA-Seq

Naïve CD4+ T cells

67.2 million reads

33 average sequence  
phred score

Memory CD4+ T cells

137 million reads

34 average sequence  
phred score

### Targeted RNA-Seq

Agilent HaloPlex

Naïve CD4+ T cells

Biological replicate 1

1.34 million reads

316x coverage per site

Biological replicate 2

1.96 million reads

436x coverage per site

### Small RNA-Seq

Naïve CD4+ T cells

13.8 million reads

36 average sequence  
phred score

### Gene Expression Array

PrimeView HG-U133

Naïve CD4+ T cells

3 technical replicates

Memory CD4+ T cells

3 technical replicates

## Protein

### Global Proteomics

iTRAQ

365,129 tandem mass spectra

Naïve CD4+ T cells

1,702,317 tandem mass spectra

### Phosphoproteomics

Naïve CD4+ T cells

311,704 tandem mass spectra

Memory CD4+ T cells

250,190 tandem mass spectra
