# Supplementary material for: A multi-omic analysis of human naïve CD4+ T cells
Source: PubMed Central journal article supplement (PMC4636073; doi:10.1186/s12918-015-0225-4), 2015-11-06

# Figure S5

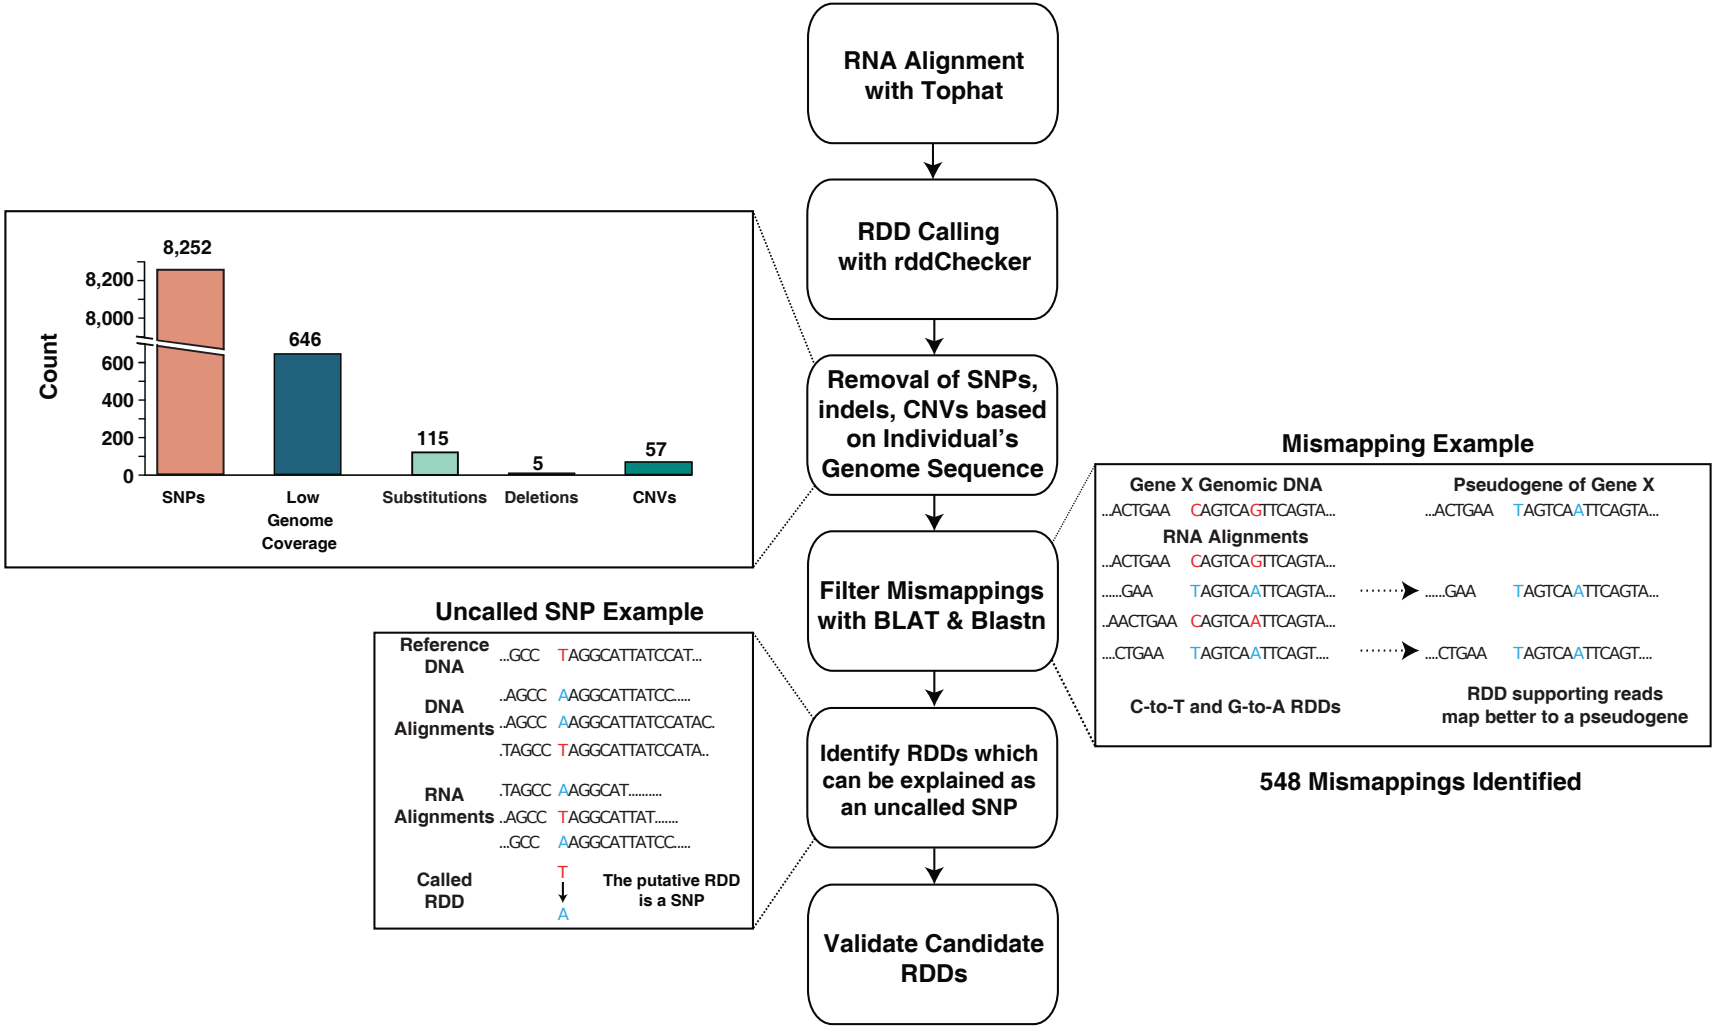

Supplement: 12918_2015_225_MOESM11_ESM.pdf [file 12918_2015_225_MOESM11_ESM.pdf]
