# Supplementary material for: A multi-omic analysis of human naïve CD4+ T cells
Source: Springer Nature journal article supplement (doi:10.1186/s12918-015-0225-4), 2015-11-06

# Figure S10

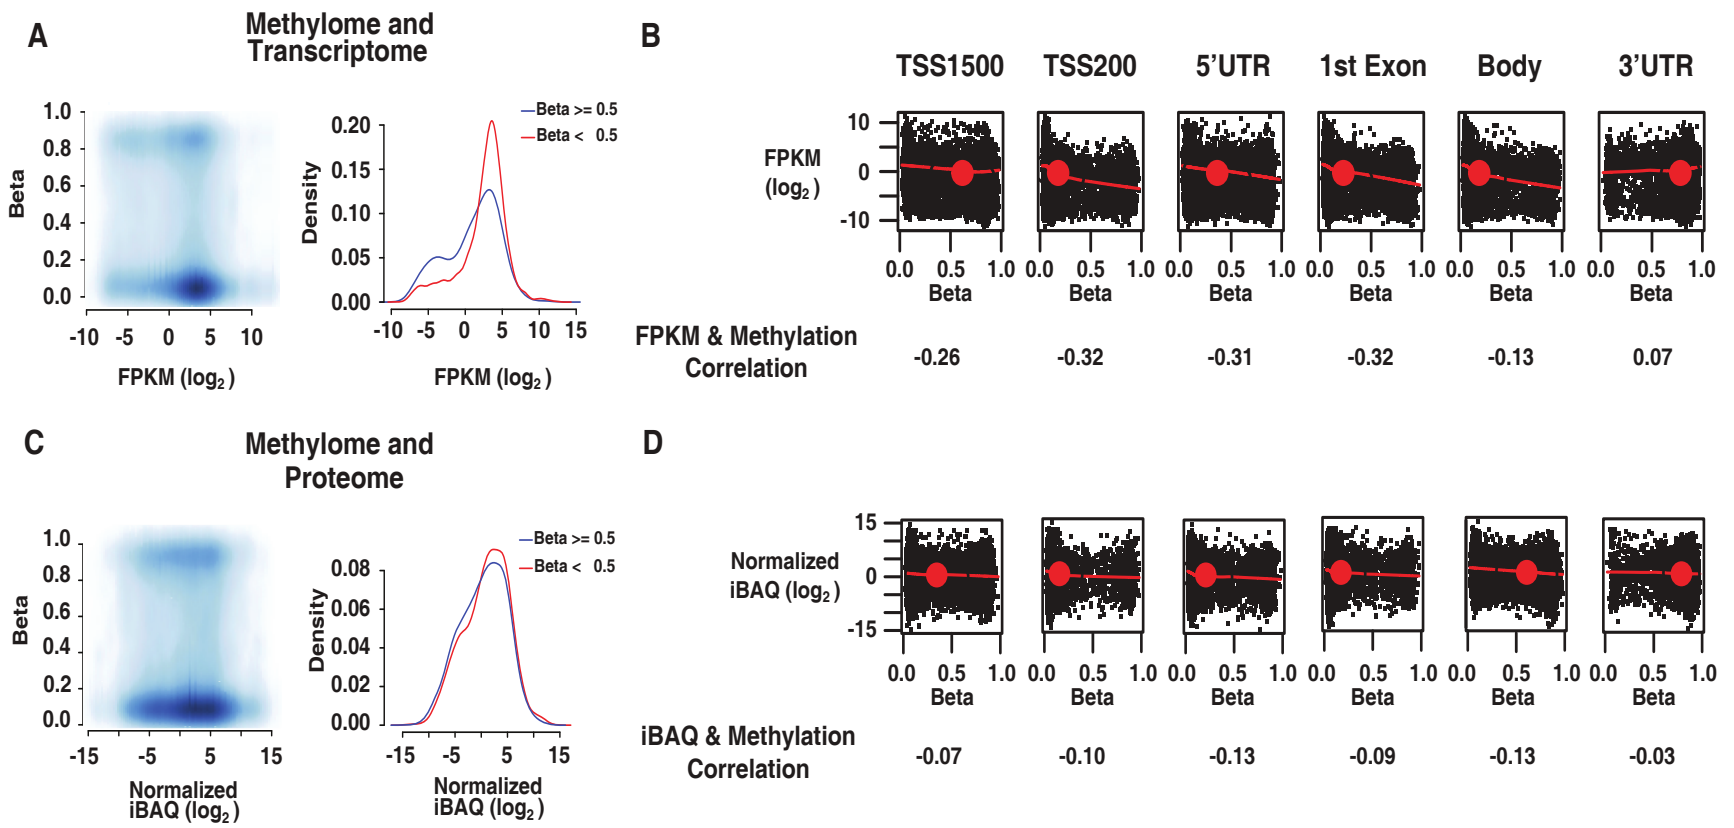

Supplement: 12918_2015_225_MOESM19_ESM.pdf [file 12918_2015_225_MOESM19_ESM.pdf]
